# Supplementary material
Source: Elsevier journal article supplement (https://www.sciencedirect.com/science/article/pii/S2659663621000187)
Supplement: mmc1 [file S2659663621000187:mmc1.pdf]

Figura 1A. Radiografía de tórax PA. Neumonectomía derecha, herniación transmediastínica e hiperinsuflación pulmonar compensatoria contralateral.

Figura 1B. TC con CIV. **Reconstrucción MIP**. Estenosis a nivel proximal de la VCS.

Figura 1C: Flebografía. Estenosis objetivada mediante instilación de contraste intravenoso a nivel proximal de la VCS y circulación colateral.

Figura 1D: **Imagen obtenida por radioscopia**. Prótesis normoposicionada a nivel proximal de la VCS, inmediatamente posterior a la confluencia del tronco braquiocefálico derecho y la vena innominada.

Figura 1E. Flebografía. Reperusión de la región estenótica de la VCS.

Figura 1F. TC con CIV. **Reconstrucción MIP**. Reperusión de la VCS tras el implante de la prótesis vascular.

Abreviaturas: PA= Posteroanterior TC = Tomografía **computarizada**. CIV = Contraste intravenoso. VCS = Vena cava superior.
